# Supplementary material for: Impact of Heavy Metals and Polystyrene Microplastics on the Bacterial Communities in Rhizosphere and Bulk Soil and the Physiological Health of Allium fistulosum
Source: Research Square preprint supplement (doi:10.21203/rs.3.rs-6139376/v1), 2025-03-07
Supplement: Supplementary file 1 [file f38f4829d9c574c0a7e8de2c.docx]

# **Supplementary material**

Table S1 Alpha diversity of the bacterial community in different treatments

| **Alpha diversity indices** | | | | |
| --- | --- | --- | --- | --- |
| **Treatments** | **Chao1 index (mean ± SD)** | **Observed species (mean ± SD)** | **Pielou_J index (mean ± SD)** | **Shannon (mean ± SD)** |
| CRM | 4787.3016 ± 944.61739 ab | 3458.3333 ± 475.18137 ab | .8217 ± .02069 ab | 6.6919 ± .27894 ab |
| CRF | 4956.1690 ± 432.90079 ab | 3377.0000 ± 74.50503 ab | .7434 ± .05181 c | 6.0402 ± .43386 c |
| T1RM | 5304.6773 ± 34.71557 ab | 3583.0000 ± 92.86011 ab | .8099 ± .01749 ab | 6.6282 ± .16419 ab |
| T1RF | 5007.8619 ± 377.12055 ab | 3527.3333 ± 161.49407 ab | .7931 ± .00745 ab | 6.4781 ± .09660 ab |
| T2RM | 5279.2777 ± 500.62904 ab | 3611.3333 ± 183.64731 ab | .8234 ± .01001 ab | 6.7447 ± .12028 ab |
| T2RF | 4345.1018 ± 805.00853 ab | 3300.6667 ± 316.68649 ab | .8153 ± .01206 ab | 6.6025 ± .03638 ab |
| T3RM | 4806.0314 ± 248.49714 ab | 3246.3333 ± 157.17930 ab | .7821 ± .03527 bc | 6.3238 ± .30755 b |
| T3RF | 4599.1251 ± 534.52306 ab | 3353.6667 ± 266.67271 ab | .8040 ± .02982 ab | 6.5265 ± .30311 ab |
| CBM | 5324.8761 ± 180.37109 ab | 3809.3333 ± 112.01042 a | .8295 ± .01299 a | 6.8394 ± .13079 a |
| CBF | 4030.6845 ± 1690.04520 b | 3120.6667 ± 737.35835 b | .8052 ± .02176 ab | 6.4648 ± .25234 abc |
| T1BM | 5440.6193 ± 603.20349 a | 3777.0000 ± 303.71203 a | .8343 ± .02147 a | 6.8711 ± .22857 a |
| T1BF | 5072.7610 ± 486.15039 ab | 3500.3333 ± 314.12153 ab | .7924 ± .02304 ab | 6.4659 ± .24880 abc |
| T2BM | 5235.0310 ± 627.69257 ab | 3618.3333 ± 249.90065 ab | .8053 ± .02038 ab | 6.5984 ± .22068 ab |
| T2BF | 4643.8323 ± 470.30564 ab | 3433.6667 ± 298.62072 ab | .8066 ± .02246 ab | 6.5660 ± .24901 ab |
| T3BM | 4251.1463 ± 761.54694 ab | 3209.3333 ± 366.48920 ab | .7959 ± .00624 ab | 6.4228 ± .12731 abc |
| T3BF | 5036.6235 ± 489.76927 ab | 3617.6667 ± 231.73548 ab | .8156 ± .01673 ab | 6.6826 ± .18605 ab |

Footnote: Mean ± SD values at ANOVA and Duncan’s test, significant *P*-value < 0.05

Abbreviations: B = bulk soil, R = rhizosphere soil, M = middle point, F = final point, C = control, T1 = PS 106 µm, T2 = PS 50 µm, T3 = PS 13 µm

Table S Correlation table between soil parameters and alpha diversity indices (Chao1 index, observed species, pielou_J index and Shannon index)

| **Alpha diversity indices** | | | | |
| --- | --- | --- | --- | --- |
| **Soil Parameters** | **Chao1 index** | **Observed species** | **Pielou_J index** | **Shannon index** |
| TP | -0.10742 | 0.192142 | 0.414851 | 0.415724 |
| OM | -0.10849 | 0.18898 | 0.387584 | 0.390209 |
| TC | -0.06463 | 0.151093 | 0.286466 | 0.301313 |
| EC | -0.02283 | 0.206331 | 0.196673 | 0.250231 |
| pH | -0.04767 | 0.239215 | 0.381332 | 0.410461 |
| TN | -0.22686 | -0.38221 | -0.29836 | -0.38839 |
| NH4+ | 0.08341 | -0.2397 | -0.41003 | -0.439 |
| NO3- | 0.210085 | -0.02736 | -0.38751 | -0.31601 |
| NO2- | 0.16595 | -0.04855 | -0.3116 | -0.27099 |
| Cd | -0.07287 | 0.192283 | 0.336276 | 0.351202 |
| Cu | -0.08326 | 0.160391 | 0.430338 | 0.409303 |
| Pb | -0.22686 | 0.056494 | 0.425467 | 0.359264 |
| Zn | 0.018405 | 0.290982 | 0.417191 | 0.44962 |
| As | -0.08852 | 0.23226 | 0.513601 | 0.497824 |

Footnote：R>0：positive correlation，R<0 ：negative correlation，R=0：uncorrelated，|R|<0.4indicates low linear correlation，0.4≤|R|<0.7indicates significant correlation，0.7≤|R|<1 indicates a highly linear correlation

Abbreviations: TP (total phosphorus), OM (organic matter), TC (total carbon), EC (electric conductivity), pH, TN (total nitrogen), NH4+ (ammonia), NO3- (nitrate), NO2- (nitrite), Cd (cadmium), Cu (copper), Pb (iron), Zn (zinc), As (arsenic)

**Table S3** Correlation table between soil physiochemical parameters and bacterial phylums

| **Soil Indicators** | **Proteo**  **bacteria** | **Acido**  **bacteriota** | **Actino**  **bacteriota** | **Chloroflexi** | **Gemmati**  **monadota** | **Bacteroidota** | **Myxococcota** | **Planctomycetota** |
| --- | --- | --- | --- | --- | --- | --- | --- | --- |
| TP | -0.18777 | 0.15284 | -0.27773 | 0.331008 | 0.057642 | -0.03406 | 0.487341 | 0.213102 |
| OM | -0.25897 | 0.241474 | -0.1916 | 0.396333 | 0.162733 | -0.07962 | 0.488198 | 0.216977 |
| TC | -0.15197 | 0.097818 | -0.01572 | 0.204369 | 0.006987 | -0.03231 | 0.217469 | 0.186901 |
| EC | -0.15804 | 0.217745 | -0.11238 | 0.224769 | 0.116775 | -0.14838 | 0.056192 | 0.062338 |
| pH | -0.18449 | 0.236567 | -0.27276 | 0.373387 | 0.093567 | -0.12535 | 0.351319 | 0.200376 |
| TN | 0.305418 | -0.32307 | 0.05208 | -0.28247 | -0.22597 | 0.048549 | -0.18184 | -0.35044 |
| NH4+ | 0.181747 | -0.2555 | 0.309057 | -0.39335 | -0.10975 | 0.173845 | -0.36349 | -0.19404 |
| NO3- | 0.049432 | -0.03001 | 0.255986 | -0.29041 | 0.003531 | 0.037957 | -0.44136 | -0.17478 |
| NO2- | -0.07327 | 0.052963 | 0.259517 | -0.24186 | 0.122697 | 0.080327 | -0.28865 | -0.07415 |
| Cd | -0.1677 | 0.183503 | -0.15277 | 0.309057 | 0.037754 | -0.10536 | 0.261645 | 0.153651 |
| Cu | -0.02717 | 0.099915 | -0.40229 | 0.324287 | -0.04645 | -0.11043 | 0.390897 | 0.209472 |
| Pb | -0.09445 | 0.109456 | -0.3266 | 0.350437 | 0.052963 | -0.09622 | 0.5208 | 0.199493 |
| Zn | -0.19895 | 0.212101 | -0.21736 | 0.374245 | 0.057846 | -0.08502 | 0.34532 | 0.219113 |
| As | -0.34795 | 0.377751 | -0.20071 | 0.482925 | 0.236642 | -0.1376 | 0.454878 | 0.289229 |

Footnote: R>0：positive correlation，R<0 ：negative correlation，R=0：uncorrelated，|R|<0.4indicates low linear correlation，0.4≤|R|<0.7indicates significant correlation，0.7≤|R|<1 indicates a highly linear correlation

Abbreviations: TP (total phosphorus), OM (organic matter), TC (total carbon), EC (electric conductivity), pH, TN (total nitrogen), NH4+ (ammonia), NO3- (nitrate), NO2- (nitrite), Cd (cadmium), Cu (copper), Pb (iron), Zn (zinc), As (arsenic)

Table S4 Correlation table between soil parameters and bacterial classes

| **Soil Indicators** | **Gamma**  **proteobacteria** | **Alpha**  **proteobacteria** | **Actino**  **bacteria** | **Vicinmi**  **bacteria** | **Gemmati**  **monadetes** | **Bacteroidia** | **Anaerolineae** | **KD4-96** |
| --- | --- | --- | --- | --- | --- | --- | --- | --- |
| TP | -0.21398 | 0.223583 | -0.27686 | 0.15022 | 0.140613 | -0.0524 | 0.240177 | 0.275985 |
| OM | -0.22485 | 0.119862 | -0.2021 | 0.250223 | 0.23885 | -0.09886 | 0.223101 | 0.373585 |
| TC | -0.20786 | 0.172927 | 0.00961 | 0.129259 | 0.083844 | -0.04804 | 0.117905 | 0.248037 |
| EC | -0.17999 | 0.078142 | -0.10273 | 0.161553 | 0.201063 | -0.18175 | 0.111507 | 0.37842 |
| pH | -0.17478 | 0.063555 | -0.2807 | 0.172129 | 0.209203 | -0.15889 | 0.22774 | 0.435177 |
| TN | 0.365443 | -0.17301 | 0.066203 | -0.28423 | -0.31866 | 0.080327 | -0.26834 | -0.22597 |
| NH4+ | 0.155407 | -0.0878 | 0.295887 | -0.20809 | -0.23531 | 0.208087 | -0.26252 | -0.42495 |
| NO3- | -0.00794 | -0.03619 | 0.29306 | -0.0662 | -0.03884 | 0.045018 | -0.10946 | -0.27805 |
| NO2- | -0.12005 | 0.079444 | 0.274523 | 0.064438 | 0.046784 | 0.097981 | -0.05031 | -0.35397 |
| Cd | -0.16243 | 0.047412 | -0.16243 | 0.146627 | 0.135213 | -0.13433 | 0.160675 | 0.40915 |
| Cu | 0.029799 | -0.02279 | -0.41544 | 0.04207 | 0.061352 | -0.13673 | 0.231383 | 0.299746 |
| Pb | 0.015889 | -0.00177 | -0.35044 | 0.129759 | 0.109456 | -0.10857 | 0.171246 | 0.295708 |
| Zn | -0.21385 | 0.106927 | -0.227 | 0.174414 | 0.170032 | -0.11657 | 0.25943 | 0.393527 |
| As | -0.2866 | 0.148997 | -0.23138 | 0.404044 | 0.319028 | -0.15951 | 0.33831 | 0.39265 |

Footnote: R>0：positive correlation，R<0 ：negative correlation，R=0：uncorrelated，|R|<0.4indicates low linear correlation，0.4≤|R|<0.7indicates significant correlation，0.7≤|R|<1 indicates a highly linear correlation

Abbreviations: TP (total phosphorus), OM (organic matter), TC (total carbon), EC (electric conductivity), pH, TN (total nitrogen), NH4+ (ammonia), NO3- (nitrate), NO2- (nitrite), Cd (cadmium), Cu (copper), Pb (iron), Zn (zinc), As (arsenic)


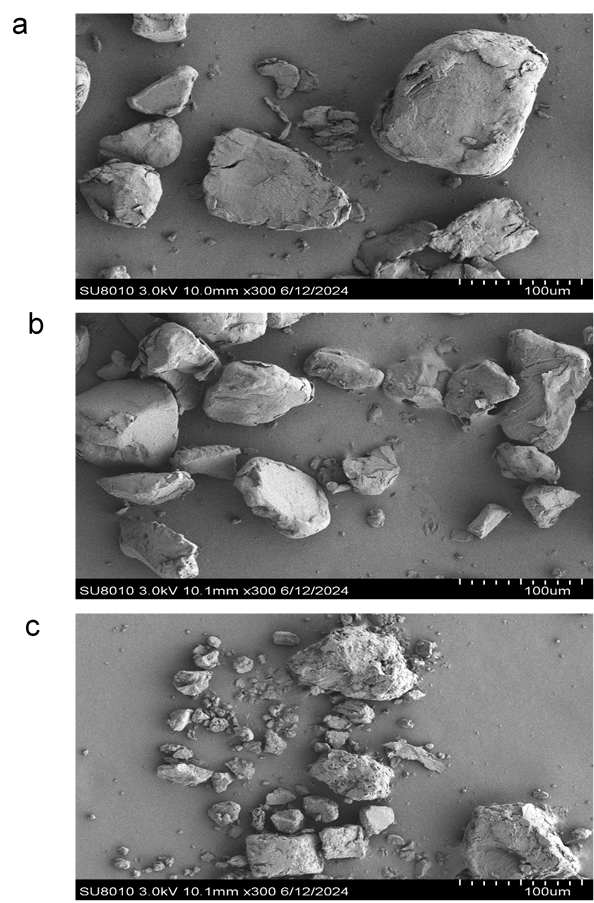


Figure S1 SEM images of PS-MPs indicate that PS-MPs are in nonuniform size and shape, and PS-MPs have blunt edges and rough surface. 10 mg of PS-MPs were taken by a spatula and poured onto a double-sided carbon tape, blown by a nitrogen gun to remove unstuck particles, then coated with sputtered ions for 40s at 25 mA (Emitech K575 Au-Pd sputter coater, Emitech Ltd., UK) for SEM observation, using a Hitachi SU8010 (Hitachi High-Tech America Inc., USA). Images were obtained in high vacuum mode with secondary electron detection at an accelerating voltage of 3 kV. While Figure a = PS 106 µm (T1), Figure b = PS 50 µm (T2) and Figure c = PS 13 µm (T3)


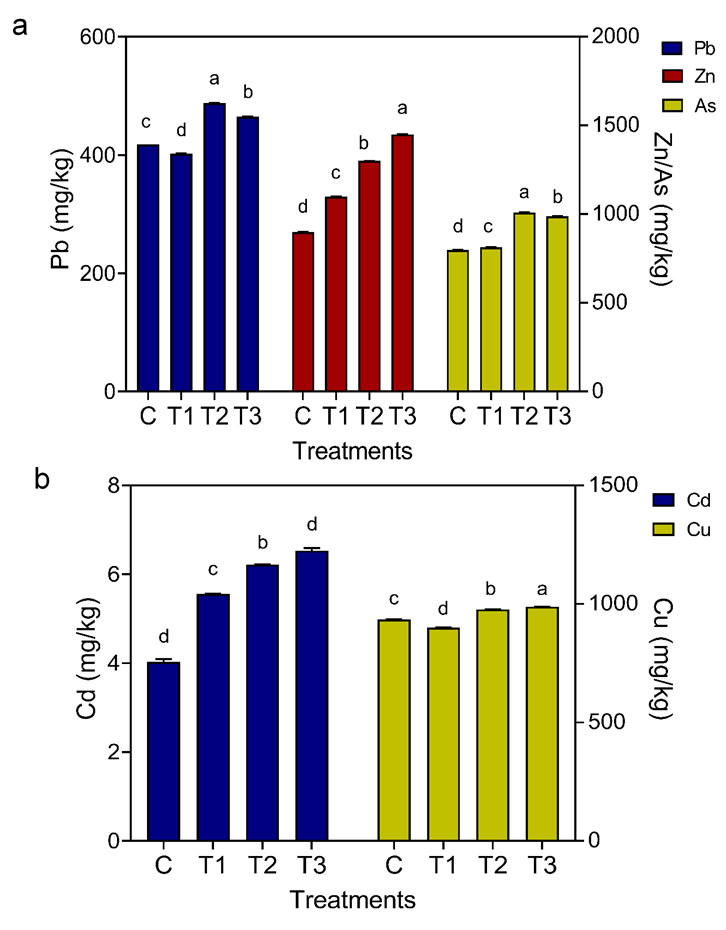


Figure S2 Soil heavy metals. Figure a represents the Pb (iron), Zn (zinc), and As (arsenic) while Figure b represents the Cd (cadmium) and Cu (copper). Small letters indicate significant differences at ANOVA and Duncan’s test, P-value < 0.05 while C = control, T1 = PS 106 µm, T2 = PS 50 µm, T3 = PS 13 µm


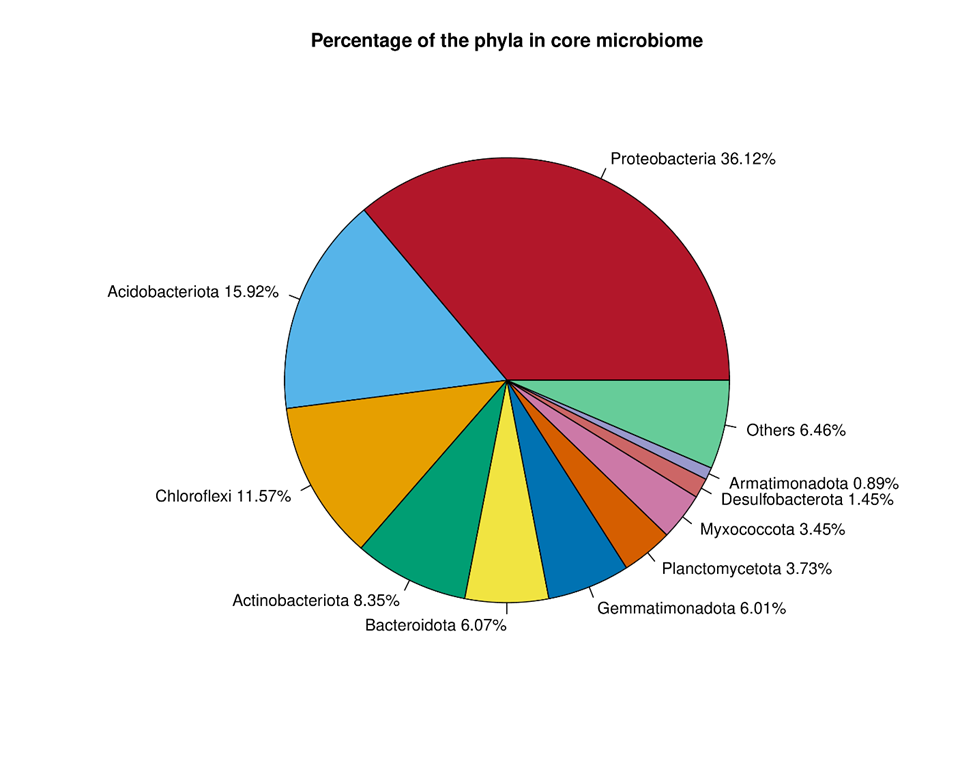
Figure S3 Percentage of the total core microbiome at the phylum level. Pie chart showing the percentage of total core microbiome at the phylum level


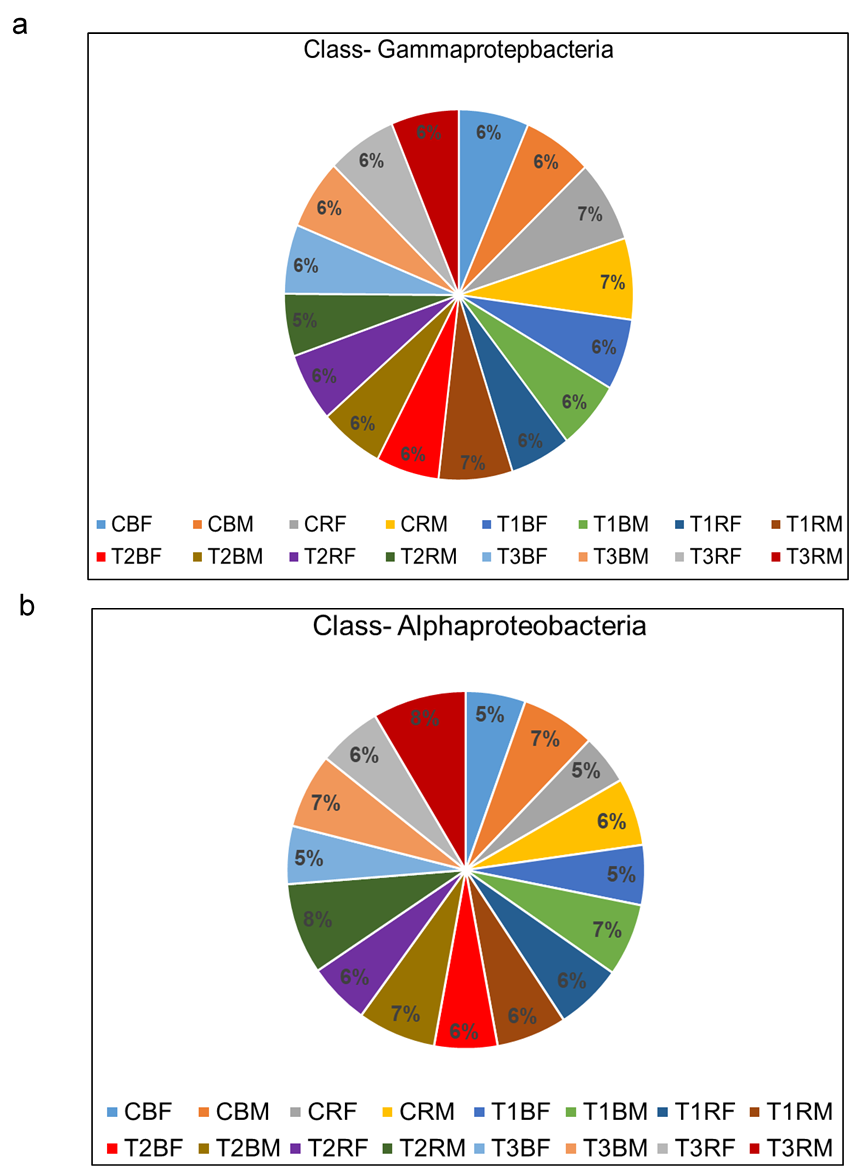


Figure S4 Pie chart showing the percentage of dominant classes. Figure a represents the dominant class Gammaproteobacteria and Figure b represents the class Alphaproteobacteria while M= middle point, F= final point, B=bulk soil, R= rhizosphere soil, C= control, T1= PS 106 µm, T2= 50 µm, T3= 13 µm


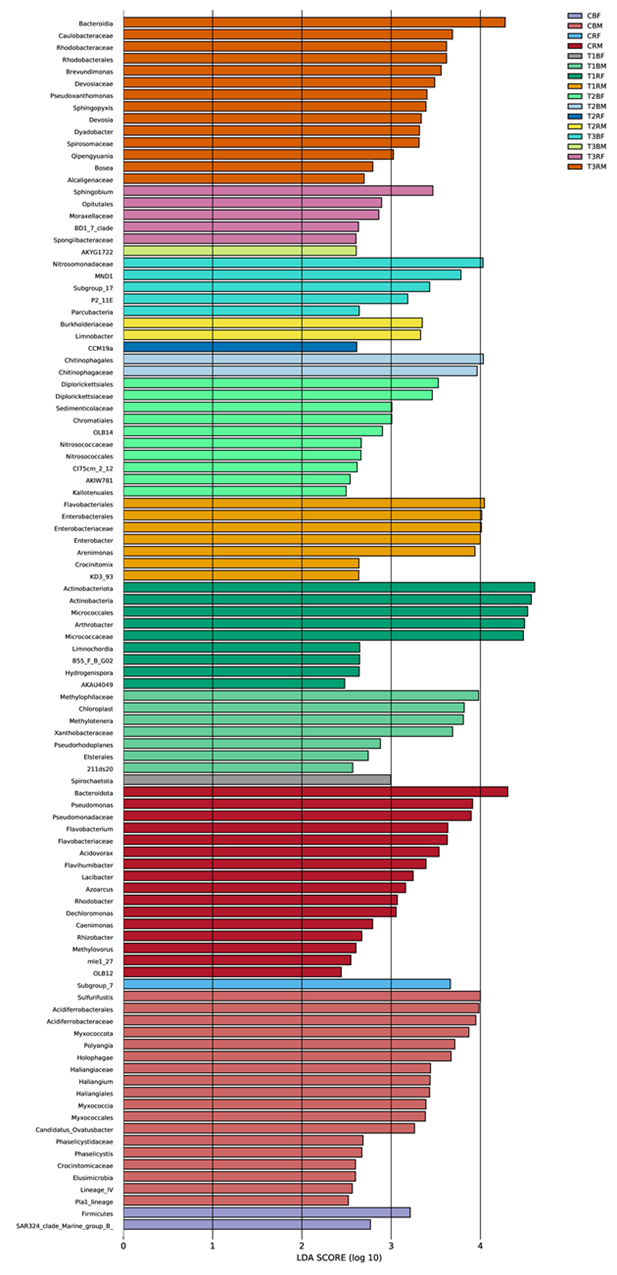


Figure S5 Linear discriminant analysis effect size (LEfSe) analysis of bacterial abundance differences among treatments. The LDA threshold score of 2.0 obtained the differences among classes. The bar plots represent the significantly differential taxa between treatments and plants, based on effect size (LDA score). While M= middle point, F= final point, B=bulk soil, R= rhizosphere soil, C= control, T1= PS 106 µm, T2= PS 50 µm, T3= PS 13 µm


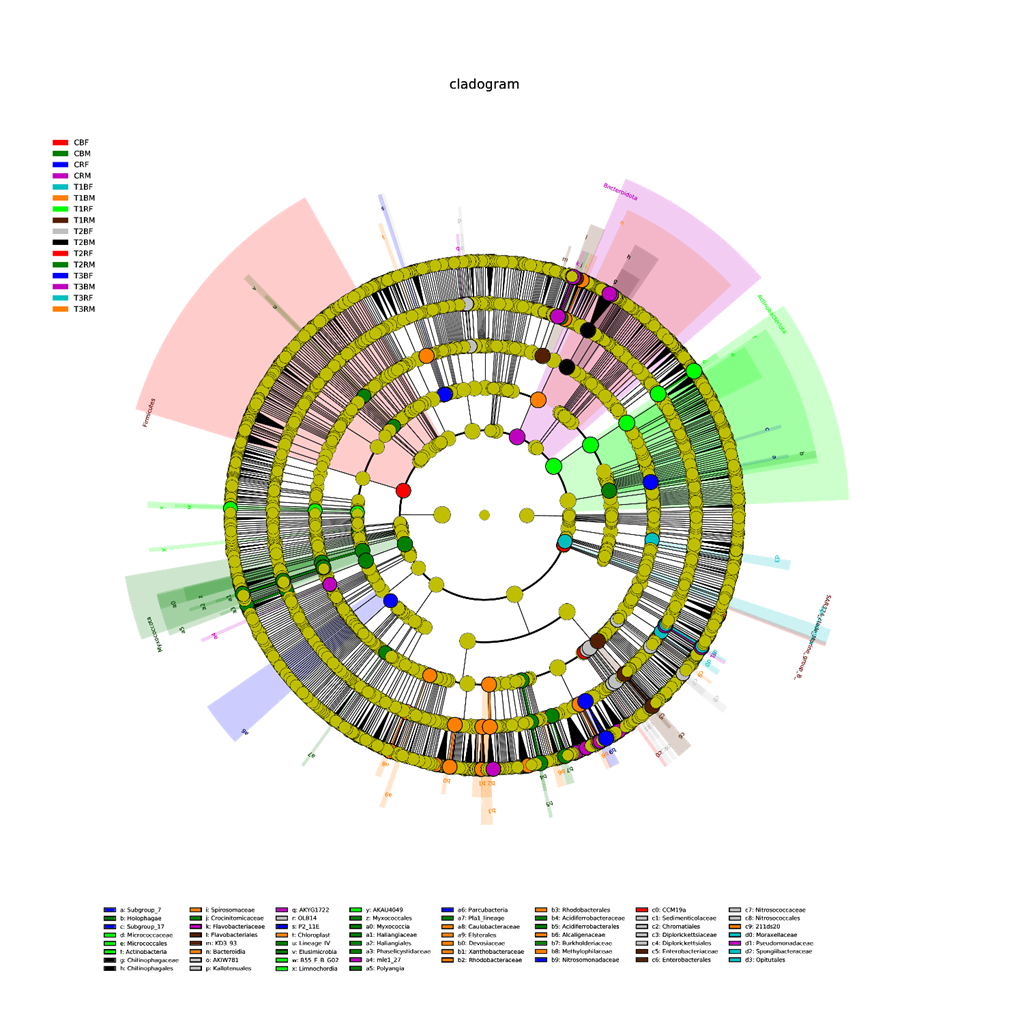


Figure S6 Linear discriminant analysis effect size (LEfSe) analysis of bacterial abundance differences among treatments and plants. The cladogram shows the taxonomic hierarchy of biomarkers identified between different treatments from phylum to family level. between treatments and plants. While M= middle point, F= final point, B=bulk soil, R= rhizosphere soil, C= control, T1= PS 106 PS µm, T2= PS 50 µm, T3= PS 13 µm


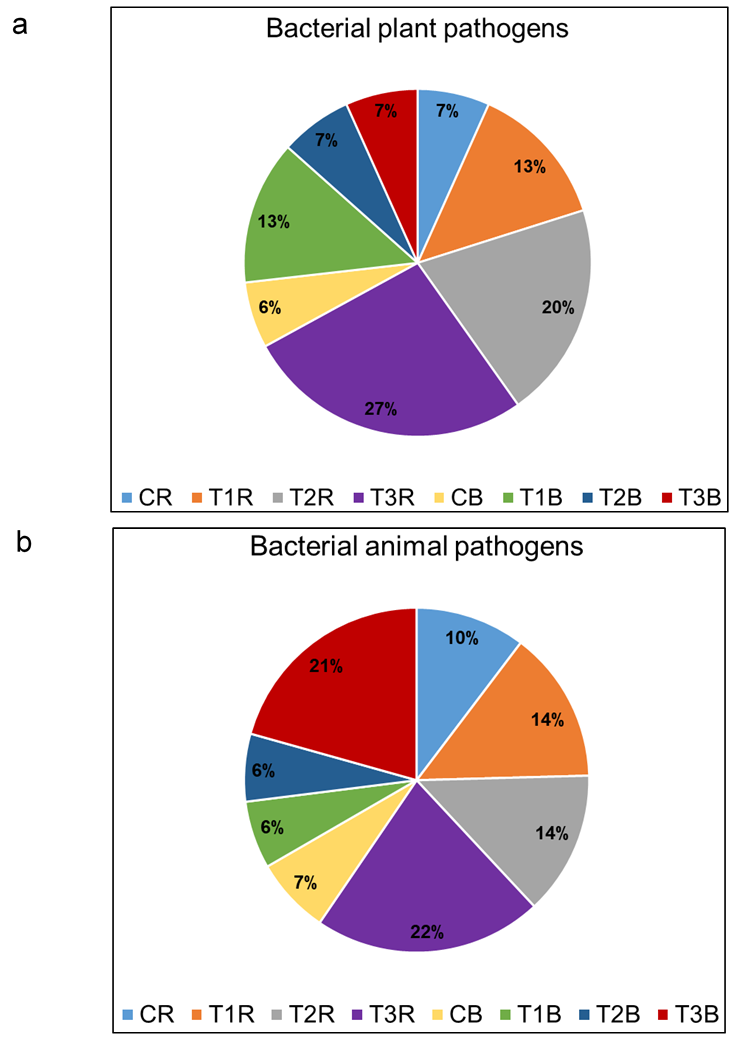


Figure S7 Bacterial plant and animal pathogens. Figure a represents a pie chart for the total average of bacterial plant pathogens and the figure b represents the pie chart for the total average of bacterial animal pathogens. While R= rhizosphere soil, B= bulk soil, C= control, T1= PS 106 µm, T2= PS 50 µm, T3= PS 13 µm


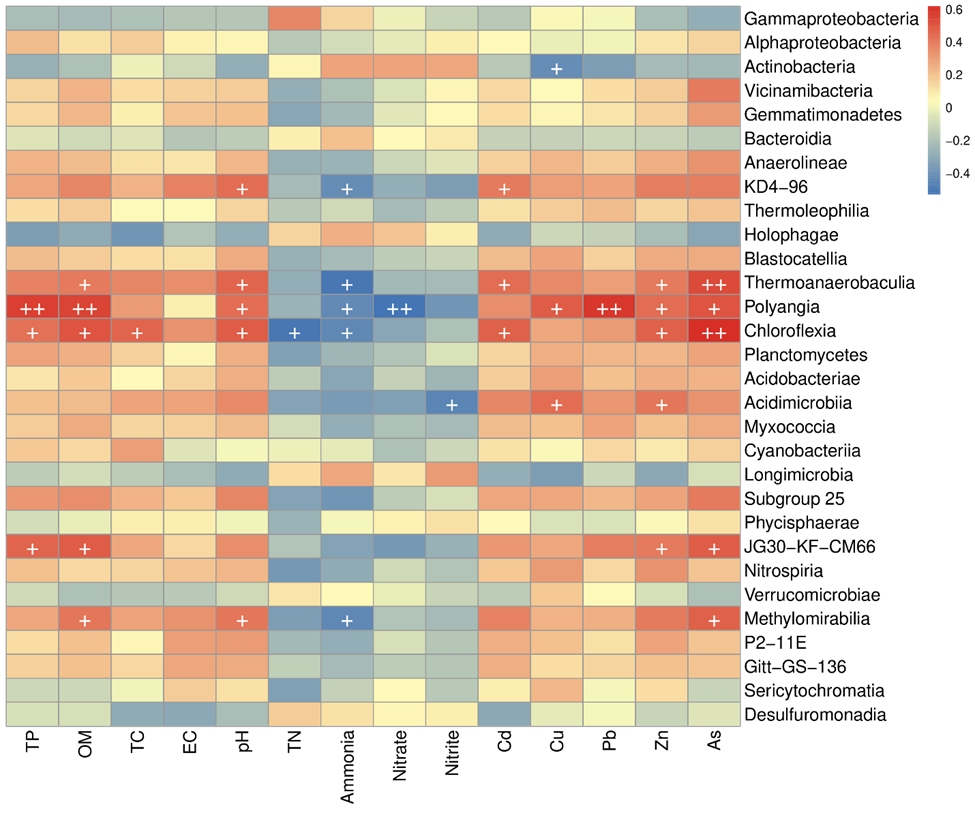
 Figure S8 Heatmap between soil parameters including TP (total phosphorus), OM (organic matter), TC (total carbon), EC (electric conductivity), pH, TN (total nitrogen), NH4+ (ammonia), NO3- (nitrate), NO2- (nitrite), Cd (cadmium), Cu (copper), Pb (iron), Zn (zinc), As (arsenic) and bacterial classes.Note：R>0：positive correlation，R<0 ：negative correlation，R=0：uncorrelated，|R|<0.4indicates low linear correlation，0.4≤|R|<0.7indicates significant correlation，0.7≤|R|<1 indicates a highly linear correlation
